# Supplementary material for: β2 integrins impose a mechanical checkpoint on macrophage phagocytosis
Source: PubMed Central journal article supplement — Nat Commun. 2024 Sep 18;15:8182. doi: 10.1038/s41467-024-52453-9 (PMC11411054; doi:10.1038/s41467-024-52453-9), 2024-09-18
Supplement: 41467_2024_52453_MOESM2_ESM.pdf [file 41467_2024_52453_MOESM2_ESM.pdf]

## Peer Review File

---

$\beta$ 2 integrins impose a mechanical checkpoint on macrophage phagocytosis

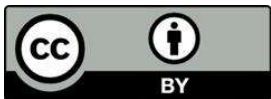

**Open Access** This file is licensed under a Creative Commons Attribution 4.0 International License, which permits use, sharing, adaptation, distribution and reproduction in any medium or format, as long as you give appropriate credit to the original author(s) and the source, provide a link to the Creative Commons license, and indicate if changes were made. In the cases where the authors are anonymous, such as is the case for the reports of anonymous peer reviewers, author attribution should be to 'Anonymous Referee' followed by a clear attribution to the source work. The images or other third party material in this file are included in the article's Creative Commons license, unless indicated otherwise in a credit line to the material. If material is not included in the article's Creative Commons license and your intended use is not permitted by statutory regulation or exceeds the permitted use, you will need to obtain permission directly from the copyright holder. To view a copy of this license, visit <http://creativecommons.org/licenses/by/4.0/>.

**Editorial Note:** This manuscript has been previously reviewed at another journal that is not operating a transparent peer review scheme. This document only contains reviewer comments and rebuttal letters for versions considered at *Nature Communications*.

## REVIEWERS' COMMENTS

Reviewer #1 (Remarks to the Author):

The authors have addressed most of my previous concerns very well. However, I remain unconvinced by the authors' conclusion that  $\beta 2$  integrins directly bind to the polyacrylamide matrix of the DAAM particle. This conclusion is unusual given the typical binding behavior of  $\beta 2$  integrins with specific biological ligands such as ICAM-1 and iC3b. Although the authors' experiments suggest that serum somewhat inhibits Itgb2 dependent cargo mechanosensing, this alone does not definitively demonstrate direct binding between  $\beta 2$  integrins and the polyacrylamide matrix. The inhibition observed could be due to other factors present in the serum affecting the interaction rather than indicating a direct binding mechanism.

Reviewer #2 (Remarks to the Author):

The authors have largely responded to my previous critiques of their initial submission and I find the manuscript much improved. The vinculin and talin data in particular is an excellent addition and strengthens the work greatly. I also think the serum free experiments and  $Mn^{2+}$  experiments help with their interpretation. I have two small remaining recommendations:

1. It still remains unclear to me how beta2 integrins could bind directly to the DAAM particles. There is no clear binding domain on the acrylamide. Also, the strength of integrin bonds comes largely from their catch-bond behavior, but in the absence of a specific ligand it's more likely to behave like a slip-bond if anything. I understand the data points in the direction of binding directly to the acrylamide, but it is such an odd result that I feel like it's worth mentioning explicitly in the text how odd this result is and that it's still possible there are other explanations.

2. In the final cartoon (Figure 8) there is text suggesting either rapid turnover or stable recruitment of vinculin. As the data in the manuscript is all shown from fixed images, the only determination can be about enrichment of vinculin, and not about the dynamics of individual molecules. If anything, vinculin binding stabilizes talin in its extended conformation (PMIDs: 24714394, 34463480). Also, it's entirely possible that the kinetics of individual vinculin molecules are identical and it's just that there is more present in the stalling phagocytosis. Since this is all speculation about what is

happening with vinculin at these sites, I would suggest removing this text in the figure and perhaps changing the number of vinculin on the stalling side to convey that there is more vinculin present.

Reviewer #3 (Remarks to the Author):

The authors have added new experimental data and points for discussion to the manuscript.

I am satisfied by these changes and recommend publication in Nat Comms.

As the mechanism presented might be incomplete, I support the addition of an "?" or "factor X" in the final model. The authors have already indicated their willingness to do this in their rebuttal letter.

We thank the reviewers for their astute suggestions about how to improve our manuscript. Below is a point-by-point response to their concerns, with reviewer text in blue, responses in black.

### Reviewer #1

The authors have addressed most of my previous concerns very well. However, I remain unconvinced by the authors' conclusion that  $\beta 2$  integrins directly bind to the polyacrylamide matrix of the DAAM particle. This conclusion is unusual given the typical binding behavior of  $\beta 2$  integrins with specific biological ligands such as ICAM-1 and iC3b. Although the authors' experiments suggest that serum somewhat inhibits Itgb2 dependent cargo mechanosensing, this alone does not definitively demonstrate direct binding between  $\beta 2$  integrins and the polyacrylamide matrix. The inhibition observed could be due to other factors present in the serum affecting the interaction rather than indicating a direct binding mechanism.

We agree with the reviewer and have altered our Discussion (p 17, paragraph 2) to communicate a higher level of uncertainty about precisely how  $\beta 2$  integrins engage DAAM particles. We believe that this more nuanced assessment better reflects our experimental results.

### Reviewer #2

The authors have largely responded to my previous critiques of their initial submission and I find the manuscript much improved. The vinculin and talin data in particular is an excellent addition and strengthens the work greatly. I also think the serum free experiments and Mn<sup>2+</sup> experiments help with their interpretation. I have two small remaining recommendations:

1. It still remains unclear to me how beta2 integrins could bind directly to the DAAM particles. There is no clear binding domain on the acrylamide. Also, the strength of integrin bonds comes largely from their catch-bond behavior, but in the absence of a specific ligand it's more likely to behave like a slip-bond if anything. I understand the data points in the direction of binding directly to the acrylamide, but it is such an odd result that I feel like it's worth mentioning explicitly in the text how odd this result is and that it's still possible there are other explanations.

Please see our response to review #1 above.

2. In the final cartoon (Figure 8) there is text suggesting either rapid turnover or stable recruitment of vinculin. As the data in the manuscript is all shown from fixed images, the only determination can be about enrichment of vinculin, and not about the dynamics of individual molecules. If anything, vinculin binding stabilizes talin in its extended conformation (PMIDs: 24714394, 34463480). Also, it's entirely possible that the kinetics of individual vinculin molecules are identical and it's just that there is more present in the stalling phagocytosis. Since this is all speculation about what is happening with vinculin at these sites, I would suggest removing this text in the figure and perhaps changing the number of vinculin on the stalling side to convey that there is more vinculin present.

We agree with the reviewer and have removed any reference to vinculin turnover from the schematic.

### Reviewer #3

The authors have added new experimental data and points for discussion to the manuscript. I am satisfied by these changes and recommend publication in Nat Comms.

As the mechanism presented might be incomplete, I support the addition of a "?" or "factor X" in the final model. The authors have already indicated their willingness to do this in their rebuttal letter.

We agree and have added a question mark to the Figure 8 schematic to indicate our uncertainty about the exact mechanisms of phagocytic stalling.
