# Supplementary material for: β2 integrins impose a mechanical checkpoint on macrophage phagocytosis
Source: PubMed Central journal article supplement — Nat Commun. 2024 Sep 18;15:8182. doi: 10.1038/s41467-024-52453-9 (PMC11411054; doi:10.1038/s41467-024-52453-9), 2024-09-18
Supplement: 41467_2024_52453_MOESM8_ESM.pdf [file 41467_2024_52453_MOESM8_ESM.pdf]

## Reporting Summary

Nature Portfolio wishes to improve the reproducibility of the work that we publish. This form provides structure for consistency and transparency in reporting. For further information on Nature Portfolio policies, see our [Editorial Policies](#) and the [Editorial Policy Checklist](#).

### Statistics

For all statistical analyses, confirm that the following items are present in the figure legend, table legend, main text, or Methods section.

n/a Confirmed

- The exact sample size ( $n$ ) for each experimental group/condition, given as a discrete number and unit of measurement
- A statement on whether measurements were taken from distinct samples or whether the same sample was measured repeatedly
- The statistical test(s) used AND whether they are one- or two-sided  
*Only common tests should be described solely by name; describe more complex techniques in the Methods section.*
- A description of all covariates tested
- A description of any assumptions or corrections, such as tests of normality and adjustment for multiple comparisons
- A full description of the statistical parameters including central tendency (e.g. means) or other basic estimates (e.g. regression coefficient) AND variation (e.g. standard deviation) or associated estimates of uncertainty (e.g. confidence intervals)
- For null hypothesis testing, the test statistic (e.g.  $F$ ,  $t$ ,  $r$ ) with confidence intervals, effect sizes, degrees of freedom and  $P$  value noted  
*Give  $P$  values as exact values whenever suitable.*
- For Bayesian analysis, information on the choice of priors and Markov chain Monte Carlo settings
- For hierarchical and complex designs, identification of the appropriate level for tests and full reporting of outcomes
- Estimates of effect sizes (e.g. Cohen's  $d$ , Pearson's  $r$ ), indicating how they were calculated

*Our web collection on [statistics for biologists](#) contains articles on many of the points above.*

### Software and code

Policy information about [availability of computer code](#)

Data collection

Data analysis

For manuscripts utilizing custom algorithms or software that are central to the research but not yet described in published literature, software must be made available to editors and reviewers. We strongly encourage code deposition in a community repository (e.g. GitHub). See the Nature Portfolio [guidelines for submitting code & software](#) for further information.

### Data

Policy information about [availability of data](#)

All manuscripts must include a [data availability statement](#). This statement should provide the following information, where applicable:

- Accession codes, unique identifiers, or web links for publicly available datasets
- A description of any restrictions on data availability
- For clinical datasets or third party data, please ensure that the statement adheres to our [policy](#)

Raw proteomic LC/MS data is available on ProteomXchange (PXD049434, link to be provided). Source Data are provided for this paper in the Source Data file. Raw flow cytometry output has been deposited on the Zenodo Repository (<https://zenodo.org/records/13351483>). Imaging files are available upon request from the lead author (Morgan Huse, [husem@mskcc.org](mailto:husem@mskcc.org)).

## Research involving human participants, their data, or biological material

Policy information about studies with [human participants or human data](#). See also policy information about [sex, gender \(identity/presentation\), and sexual orientation](#) and [race, ethnicity and racism](#).

|                                                                    |     |
|--------------------------------------------------------------------|-----|
| Reporting on sex and gender                                        | N/A |
| Reporting on race, ethnicity, or other socially relevant groupings | N/A |
| Population characteristics                                         | N/A |
| Recruitment                                                        | N/A |
| Ethics oversight                                                   | N/A |

Note that full information on the approval of the study protocol must also be provided in the manuscript.

## Field-specific reporting

Please select the one below that is the best fit for your research. If you are not sure, read the appropriate sections before making your selection.

Life sciences       Behavioural & social sciences       Ecological, evolutionary & environmental sciences

For a reference copy of the document with all sections, see [nature.com/documents/nr-reporting-summary-flat.pdf](https://nature.com/documents/nr-reporting-summary-flat.pdf)

## Life sciences study design

All studies must disclose on these points even when the disclosure is negative.

|                 |                                                                                                                                                                                                                                                                                                                                              |
|-----------------|----------------------------------------------------------------------------------------------------------------------------------------------------------------------------------------------------------------------------------------------------------------------------------------------------------------------------------------------|
| Sample size     | We did not predetermine a selected sample size. Sample sizes were determined based prior experience and pilot studies.                                                                                                                                                                                                                       |
| Data exclusions | We did not exclude any data.                                                                                                                                                                                                                                                                                                                 |
| Replication     | All findings and statistical analyses described in the manuscript are the result of at least 2 experimental replicates, or show data pooled from independent biological replicates. When relevant each replicate used biological material from a unique animal. Otherwise each replicate reflected a unique iteration of sample preparation. |
| Randomization   | Experimental groups were defined by genotype, pharmacological treatment, or target identity. In all experiments, appropriate controls were taken such that individual variables were isolated. Samples were not randomized during processing or data collection.                                                                             |
| Blinding        | During image analysis where manual input was required, samples were blinded using a custom MATLAB script to present the data in a random order without labels. For all other analyses, blinding was not relevant because data capture and analysis was automated and applied equally to all samples.                                         |

## Reporting for specific materials, systems and methods

We require information from authors about some types of materials, experimental systems and methods used in many studies. Here, indicate whether each material, system or method listed is relevant to your study. If you are not sure if a list item applies to your research, read the appropriate section before selecting a response.

### Materials & experimental systems

| n/a                                 | Involvement in the study                                        |
|-------------------------------------|-----------------------------------------------------------------|
| <input type="checkbox"/>            | <input checked="" type="checkbox"/> Antibodies                  |
| <input type="checkbox"/>            | <input checked="" type="checkbox"/> Eukaryotic cell lines       |
| <input checked="" type="checkbox"/> | <input type="checkbox"/> Palaeontology and archaeology          |
| <input type="checkbox"/>            | <input checked="" type="checkbox"/> Animals and other organisms |
| <input checked="" type="checkbox"/> | <input type="checkbox"/> Clinical data                          |
| <input checked="" type="checkbox"/> | <input type="checkbox"/> Dual use research of concern           |
| <input checked="" type="checkbox"/> | <input type="checkbox"/> Plants                                 |

### Methods

| n/a                                 | Involvement in the study                           |
|-------------------------------------|----------------------------------------------------|
| <input checked="" type="checkbox"/> | <input type="checkbox"/> ChIP-seq                  |
| <input type="checkbox"/>            | <input checked="" type="checkbox"/> Flow cytometry |
| <input checked="" type="checkbox"/> | <input type="checkbox"/> MRI-based neuroimaging    |

## Antibodies

|                 |                                                                                                                                                                                                                                                                                                                                                                                                                                                                                                                                                                                                                                                                                                                                                                                                                                                                                                                                                                                                                                                                                                                                                                                                                                                                                                                                                                                                                                                                                                                                                                                                                                                                                                                                                                                                                                                                                                                                                                                                                                                                                                                                                                                                                                                                                                                                                                                                                                                            |
|-----------------|------------------------------------------------------------------------------------------------------------------------------------------------------------------------------------------------------------------------------------------------------------------------------------------------------------------------------------------------------------------------------------------------------------------------------------------------------------------------------------------------------------------------------------------------------------------------------------------------------------------------------------------------------------------------------------------------------------------------------------------------------------------------------------------------------------------------------------------------------------------------------------------------------------------------------------------------------------------------------------------------------------------------------------------------------------------------------------------------------------------------------------------------------------------------------------------------------------------------------------------------------------------------------------------------------------------------------------------------------------------------------------------------------------------------------------------------------------------------------------------------------------------------------------------------------------------------------------------------------------------------------------------------------------------------------------------------------------------------------------------------------------------------------------------------------------------------------------------------------------------------------------------------------------------------------------------------------------------------------------------------------------------------------------------------------------------------------------------------------------------------------------------------------------------------------------------------------------------------------------------------------------------------------------------------------------------------------------------------------------------------------------------------------------------------------------------------------------|
| Antibodies used | <p>anti-CD18-AF647: Clone M18/2, BioLegend 101414<br/> anti-CD11b-APC: Clone M1/70, Invitrogen # 17-0112-82<br/> anti-CD11c-FITC: Clone N418, Invitrogen #11-0114-82<br/> anti-F4/80-BV421: Clone T45-2342, BD Biosciences 565411<br/> anti-Ly6G-BV650: Clone 1A8, BD Biosciences 740554<br/> anti-Talin: Clone: 8D4, Abcam ab157808<br/> anti-Vinculin: Polyclonal, Abcam ab91459<br/> anti-actin: clone AC-15, Sigma A2066<br/> anti-GAPDH: clone 14C10, Cell Signaling Technology 3683<br/> Goat anti-Mouse 800CW, LI-COR 925-32210<br/> Goat Anti-Rabbit 680RD, LI-COR 926-68071</p>                                                                                                                                                                                                                                                                                                                                                                                                                                                                                                                                                                                                                                                                                                                                                                                                                                                                                                                                                                                                                                                                                                                                                                                                                                                                                                                                                                                                                                                                                                                                                                                                                                                                                                                                                                                                                                                                   |
| Validation      | <p>All antibodies were commercially validated using company-specific method:</p> <p>BioLegend (<a href="https://www.biolegend.com/en-us/quality/quality-control">https://www.biolegend.com/en-us/quality/quality-control</a>)<br/> Specificity testing of 1-3 target cell types with either single- or multi-color analysis (including positive and negative cell types). Once specificity is confirmed, each new lot must perform with similar intensity to the in-date reference lot. Brightness (MFI) is evaluated from both positive and negative populations. Each lot product is validated by QC testing with a series of titration dilutions.</p> <p>BD Biosciences (<a href="https://www.bdbiosciences.com/en-us/products/reagents/flow-cytometry-reagents/research-reagents/quality-and-reproducibility">https://www.bdbiosciences.com/en-us/products/reagents/flow-cytometry-reagents/research-reagents/quality-and-reproducibility</a>):<br/> The specificity is confirmed using multiple methodologies that may include a combination of flow cytometry, immunofluorescence, immunohistochemistry or western blot to test staining on a combination of primary cells, cell lines or transfectant models. All flow cytometry reagents are titrated on the relevant positive or negative cells</p> <p>Invitrogen (<a href="https://www.thermofisher.com/us/en/home/life-science/antibodies/invitrogen-antibody-validation.html">https://www.thermofisher.com/us/en/home/life-science/antibodies/invitrogen-antibody-validation.html</a>):<br/> Antibody specificity was demonstrated by detection of differential basal expression of the target across cell models owing to their inherent genetic constitution. [...] Using gating techniques, verification of antibody binding can be determined by analyzing expression in unique cell types.</p> <p>Abcam (<a href="https://www.abcam.com/primary-antibodies/how-we-validate-our-antibodies">https://www.abcam.com/primary-antibodies/how-we-validate-our-antibodies</a>):<br/> Antibodies are validated in western blot using lysates from cells or tissues that we have identified to express the protein of interest. Once we have determined the right lysates to use, western blots are run and the band size is checked for the expected molecular weight. We will always run several controls in the same western blot experiment, including positive lysate and negative lysate</p> |

## Eukaryotic cell lines

Policy information about [cell lines and Sex and Gender in Research](#)

|                                                                   |                                                                                                                                                                                                                                                                                                                                                                                                                                                                                                                                                                                                                                                                                                                                                                                                               |
|-------------------------------------------------------------------|---------------------------------------------------------------------------------------------------------------------------------------------------------------------------------------------------------------------------------------------------------------------------------------------------------------------------------------------------------------------------------------------------------------------------------------------------------------------------------------------------------------------------------------------------------------------------------------------------------------------------------------------------------------------------------------------------------------------------------------------------------------------------------------------------------------|
| Cell line source(s)                                               | <p>E0771 cells (female) were acquired from ATCC (CRL-3461™), and the MTRF-A expression lines were derived from E0771 cells as previously described (Tello La Foz et al, Immunity 2021, DOI: 10.1016/j.immuni.2021.02.020).<br/> L929 cells (male) were acquired from ATCC (CCL-1™)<br/> HoxB8-ER conditionally-immortalized cells were generated, as described in the manuscript, from the bone marrow of male mice from C57BL/6J (Jackson Labs Strain #:000664) or B6.129(Cg)-Gt(ROSA)26Sortm1.1(CAG-cas9*,-EGFP)Fezh/J (Jackson Strain #: 026179)<br/> Human macrophages were differentiated from 731.2B-iPSCs, which were generated from human male fibroblasts (GM00731) purchased from the Coriell Institute. Use of the 731.2B-iPSC cell line was approved by the MSKCC Institutional Review Board.</p> |
| Authentication                                                    | <p>731.2B-iPSCs were authenticated by the Stem Cell Research Facility at MSKCC. They express the expected levels of OCT4, SOX2, and NANOG, and have a normal karyotype. E0771 cell lines were not authenticated. L929 cells were authenticated by their capacity to stimulate BMDM differentiation.</p>                                                                                                                                                                                                                                                                                                                                                                                                                                                                                                       |
| Mycoplasma contamination                                          | <p>731.2B-iPSCs and HoxB8-ER conditionally immortalized cells were regularly tested for mycoplasma contamination and received negative results. E0771 cell lines were not tested for mycoplasma contamination.</p>                                                                                                                                                                                                                                                                                                                                                                                                                                                                                                                                                                                            |
| Commonly misidentified lines (See <a href="#">ICLAC</a> register) | <p>No commonly misidentified lines were used.</p>                                                                                                                                                                                                                                                                                                                                                                                                                                                                                                                                                                                                                                                                                                                                                             |

## Animals and other research organisms

Policy information about [studies involving animals; ARRIVE guidelines](#) recommended for reporting animal research, and [Sex and Gender in Research](#)

|                    |                                                                                                                                                                                                                                                                                                                                                                                                                         |
|--------------------|-------------------------------------------------------------------------------------------------------------------------------------------------------------------------------------------------------------------------------------------------------------------------------------------------------------------------------------------------------------------------------------------------------------------------|
| Laboratory animals | <p>Mouse (M. Musculus) Strains:<br/> C57BL/6J (Jackson Labs Strain #:000664), Ages 6-24 weeks<br/> B6.129(Cg)-Gt(ROSA)26Sortm1.1(CAG-cas9*,-EGFP)Fezh/J (Jackson Labs Strain #: 026179), Ages 6-8 weeks<br/> B6.129S7-Itgb2tm2Bay/J (Jackson Labs Strain #:003329), Ages 6-12 weeks<br/> Mice were housed in an SPF facility under standard conditions (12 h light, 12 h dark, room temperature, ambient humidity).</p> |
|--------------------|-------------------------------------------------------------------------------------------------------------------------------------------------------------------------------------------------------------------------------------------------------------------------------------------------------------------------------------------------------------------------------------------------------------------------|

|                         |                                                                                                                                                                                                                                                              |
|-------------------------|--------------------------------------------------------------------------------------------------------------------------------------------------------------------------------------------------------------------------------------------------------------|
| Wild animals            | The study did not involve wild animals                                                                                                                                                                                                                       |
| Reporting on sex        | For generation of HoxB8-ER cell lines and subsequent experiments, only male subjects were used because the maintenance of the cells require the absence of endogenous estrogen signaling.<br>For all other experiments, both male and female mice were used. |
| Field-collected samples | The study did not involve field-collected samples                                                                                                                                                                                                            |
| Ethics oversight        | The animal protocols used for this study were approved by the Institutional Animal Care and Use Committee of Memorial Sloan Kettering Cancer Center.                                                                                                         |

Note that full information on the approval of the study protocol must also be provided in the manuscript.

## Plants

|                       |     |
|-----------------------|-----|
| Seed stocks           | N/A |
| Novel plant genotypes | N/A |
| Authentication        | N/A |

## Flow Cytometry

### Plots

Confirm that:

- The axis labels state the marker and fluorochrome used (e.g. CD4-FITC).
- The axis scales are clearly visible. Include numbers along axes only for bottom left plot of group (a 'group' is an analysis of identical markers).
- All plots are contour plots with outliers or pseudocolor plots.
- A numerical value for number of cells or percentage (with statistics) is provided.

### Methodology

|                           |                                                                                                                                                                                                                                                                                                                                                                                                                                                                                                                                                                                                           |
|---------------------------|-----------------------------------------------------------------------------------------------------------------------------------------------------------------------------------------------------------------------------------------------------------------------------------------------------------------------------------------------------------------------------------------------------------------------------------------------------------------------------------------------------------------------------------------------------------------------------------------------------------|
| Sample preparation        | For in-vitro phagocytosis assays, macrophages were incubated with FITC/LRB labeled particles and then harvested by trypsinization. Samples were collected into 96-well plates and washed by centrifugation (500x g, 2min) in PBS. For labeling, cells were first incubated with Fc-block (CD16/32) for 30 minutes followed by primary antibody for 30 minutes at 4°C. Cells were incubated in 3µM DAPI 5 minutes prior to measurement.<br><br>For in vivo phagocytosis assays, cells were first harvested by peritoneal lavage with PBS and collected into 96-well plates and stained as described above. |
| Instrument                | The Beckman Coulter CytoFLEX LX flow cytometer was used to collect flow cytometry data in this study.                                                                                                                                                                                                                                                                                                                                                                                                                                                                                                     |
| Software                  | CytExpert software(version 2.3) was used to collect flow cytometry data. FlowJo software (version 10.10) was used to analyze flow cytometry data.                                                                                                                                                                                                                                                                                                                                                                                                                                                         |
| Cell population abundance | For in-vitro macrophage cultures, >95% of cells were macrophages<br>For in vivo peritoneal macrophages, 1-5% of cells were macrophages, as determined by CD11b/F480 staining, see Fig 2F                                                                                                                                                                                                                                                                                                                                                                                                                  |
| Gating strategy           | To determine the LRBhi/FITC <sup>lo</sup> population, unconjugated beads were used as a negative control to determine the distribution of FITC/LRB signal in the particles. Gates were drawn at the same LRB level with FITC fluorescence below the measured range of unconjugated particles.                                                                                                                                                                                                                                                                                                             |

- Tick this box to confirm that a figure exemplifying the gating strategy is provided in the Supplementary Information.
